# Supplementary material for: [Characteristic values and test statistical goodness of the Veterans RAND 12-Item Health Survey (VR-12) in patients with chronic pain : An evaluation based on the KEDOQ pain dataset].
Source: Springer Nature journal article supplement (doi:10.1007/s00482-021-00570-5), 2022-04-01
Supplement: MOESM1 [file 19373086]

## Elektronisches Zusatzmaterial: Gesundheitsbezogene Lebensqualität: VR-12

In diesem Fragebogen geht es um die Beurteilung Ihres Gesundheitszustandes. Ihre Angaben ermöglichen es nachzuvollziehen, wie Sie sich fühlen und wie gut Sie Ihre Alltagstätigkeiten ausüben können.

Bitte beantworten Sie jede Frage, indem Sie die Antwortmöglichkeit ankreuzen, die am besten auf Sie zutrifft. Wenn Sie sich bei der Antwort auf eine Frage unsicher sind, beantworten Sie diese bitte so gut wie möglich.

|                                                                              | aus-<br>gezeichnet       | sehr gut                 | gut                      | weniger<br>gut           | schlecht                 |
|------------------------------------------------------------------------------|--------------------------|--------------------------|--------------------------|--------------------------|--------------------------|
| 1. Wie würden Sie Ihren Gesundheitszustand im Allgemeinen beschreiben? ..... | <input type="checkbox"/> | <input type="checkbox"/> | <input type="checkbox"/> | <input type="checkbox"/> | <input type="checkbox"/> |

In den folgenden Fragen geht es um Tätigkeiten, die Sie vielleicht im Laufe eines normalen Tages ausüben. Sind Sie derzeit aufgrund Ihrer Gesundheit bei diesen Tätigkeiten eingeschränkt? Wenn ja, wie stark?

|                                                                                               | ja, stark<br>eingeschränkt | ja, etwas<br>eingeschränkt | nein, überhaupt<br>nicht<br>eingeschränkt |
|-----------------------------------------------------------------------------------------------|----------------------------|----------------------------|-------------------------------------------|
| 2. <b>mittelschwere Tätigkeiten</b> , z.B. einen Tisch verschieben, staubsaugen, kegeln ..... | <input type="checkbox"/>   | <input type="checkbox"/>   | <input type="checkbox"/>                  |
| 3. <b>mehrere Treppenabsätze steigen</b> .....                                                | <input type="checkbox"/>   | <input type="checkbox"/>   | <input type="checkbox"/>                  |

Hatten Sie in den vergangenen 4 Wochen aufgrund Ihrer **körperlichen** Gesundheit die folgenden Probleme bei der Arbeit oder bei anderen Alltagstätigkeiten?

|                                                                              | nie                      | selten                              | manchmal                 | meistens                 | immer                    |
|------------------------------------------------------------------------------|--------------------------|-------------------------------------|--------------------------|--------------------------|--------------------------|
| 4. Ich habe weniger geschafft als ich wollte .....                           | <input type="checkbox"/> | <input checked="" type="checkbox"/> | <input type="checkbox"/> | <input type="checkbox"/> | <input type="checkbox"/> |
| 5. Ich konnte nur bestimmte Arbeiten oder andere Tätigkeiten ausführen ..... | <input type="checkbox"/> | <input type="checkbox"/>            | <input type="checkbox"/> | <input type="checkbox"/> | <input type="checkbox"/> |

Hatten Sie in den vergangenen 4 Wochen aufgrund **seelischer** Probleme die folgenden Schwierigkeiten bei der Arbeit oder bei anderen Alltagstätigkeiten (z.B. weil Sie sich niedergeschlagen oder ängstlich fühlten)?

|                                                                                                  | nie                      | selten                   | manchmal                 | meistens                 | immer                    |
|--------------------------------------------------------------------------------------------------|--------------------------|--------------------------|--------------------------|--------------------------|--------------------------|
| 6. Ich habe weniger geschafft als ich wollte .....                                               | <input type="checkbox"/> | <input type="checkbox"/> | <input type="checkbox"/> | <input type="checkbox"/> | <input type="checkbox"/> |
| 7. Ich konnte meine Arbeit oder andere Tätigkeiten nicht so sorgfältig wie sonst erledigen ..... | <input type="checkbox"/> | <input type="checkbox"/> | <input type="checkbox"/> | <input type="checkbox"/> | <input type="checkbox"/> |

|                                                                                                                                       | überhaupt<br>nicht       | ein<br>wenig             | mäßig                    | ziemlich                 | sehr                     |
|---------------------------------------------------------------------------------------------------------------------------------------|--------------------------|--------------------------|--------------------------|--------------------------|--------------------------|
| 8. Inwieweit haben Schmerzen <u>in den vergangenen 4 Wochen</u> Ihre Alltagstätigkeiten (im Beruf und zu Hause) beeinträchtigt? ..... | <input type="checkbox"/> | <input type="checkbox"/> | <input type="checkbox"/> | <input type="checkbox"/> | <input type="checkbox"/> |

In diesen Fragen geht es darum, wie Sie sich in den vergangenen 4 Wochen gefühlt haben und wie es Ihnen ergangen ist. Bitte kreuzen Sie bei jeder Frage die Antwort an, die am besten beschreibt, wie Sie sich gefühlt haben.

|                                                                 | immer                    | meistens                 | ziemlich<br>oft          | manchmal                 | selten                   | nie                      |
|-----------------------------------------------------------------|--------------------------|--------------------------|--------------------------|--------------------------|--------------------------|--------------------------|
| Wie oft fühlten Sie sich <u>in den vergangenen 4 Wochen</u> ... |                          |                          |                          |                          |                          |                          |
| 9. ruhig und gelassen? .....                                    | <input type="checkbox"/> | <input type="checkbox"/> | <input type="checkbox"/> | <input type="checkbox"/> | <input type="checkbox"/> | <input type="checkbox"/> |
| 10. voller Energie?.....                                        | <input type="checkbox"/> | <input type="checkbox"/> | <input type="checkbox"/> | <input type="checkbox"/> | <input type="checkbox"/> | <input type="checkbox"/> |
| 11. entmutigt und traurig?.....                                 | <input type="checkbox"/> | <input type="checkbox"/> | <input type="checkbox"/> | <input type="checkbox"/> | <input type="checkbox"/> | <input type="checkbox"/> |

|                                                                                                                                                                                                              | immer                    | meistens                 | manchmal                 | selten                   | nie                      |
|--------------------------------------------------------------------------------------------------------------------------------------------------------------------------------------------------------------|--------------------------|--------------------------|--------------------------|--------------------------|--------------------------|
| 12. Wie häufig haben Ihre körperliche Gesundheit oder seelischen Probleme <u>in den vergangenen 4 Wochen</u> Ihre Kontakte zu anderen Menschen (Besuche bei Freunden, Verwandten usw.) beeinträchtigt? ..... | <input type="checkbox"/> | <input type="checkbox"/> | <input type="checkbox"/> | <input type="checkbox"/> | <input type="checkbox"/> |
