# Supplementary material for: [Characteristic values and test statistical goodness of the Veterans RAND 12-Item Health Survey (VR-12) in patients with chronic pain : An evaluation based on the KEDOQ pain dataset].
Source: Springer Nature journal article supplement (doi:10.1007/s00482-021-00570-5), 2022-04-01
Supplement: MOESM2 [file 19373086]

**Elektronisches Zusatzmaterial: Auswertung des VR-12 (nur möglich bei allen beantworteten Items)**

*1. den Antwortkategorien der 12 Items Zahlenwerte (1-3 oder 5 oder 6) zuordnen*

- Item I\_01\_gesund\_allg (1=ausgezeichnet bis 5=schlecht)
- Item I\_02\_mittelschwer (1=ja bis 3=nein)
- Item I\_03\_treppen (1=stark eingeschränkt bis 3=nein)
- Item I\_04\_koerperl (1=nein, nie bis 5=ja, immer)
- Item I\_05\_dinge (1=nein, nie bis 5=ja, immer)
- Item I\_06\_seelisch (1=nein, nie bis 5=ja, immer)
- Item I\_07\_sorgfaltig (1=nein, nie bis 5=ja, immer)
- Item I\_08\_behindert (1=überhaupt nicht bis 5=sehr)
- Item I\_09\_ruhig (1=immer bis 6=nie)
- Item I\_10\_energie (1=immer bis 6=nie)
- Item I\_11\_traurig (1=immer bis 6=nie)
- Item I\_12\_beeinträchtigt (1=immer bis 5=nie)

*2. die Zahlenwerte umkodieren in Werte zwischen 0 und 100*

- I\_01\_gesund\_allg (1=100) (2=85) (3=60) (4=35) (5=0)
- I\_02\_mittelschwer (1=0) (2=50) (3=100)
- I\_03\_treppen (1=0) (2=50) (3=100)
- I\_04\_koerperl (1=100) (2=75) (3=50) (4=25) (5=0)
- I\_05\_dinge (1= 100) (2=75) (3=50) (4=25) (5=0)
- I\_06\_seelisch (1=100) (2=75) (3=50) (4=25) (5=0)
- I\_07\_sorgfaltig\_VR (1=100) (2=75) (3=50) (4=25) (5=0)
- I\_08\_behindert (1=100) (2=75) (3=50) (4=25) (5=0)
- I\_09\_ruhig (1=100) (2=80) (3=60) (4=40) (5=20) (6=0)
- I\_10\_energie (1=100) (2=80) (3=60) (4=40) (5=20) (6=0)
- I\_11\_traurig (1=0) (2=20) (3=40) (4=60) (5=80) (6=100)
- I\_12\_beeinträchtigt (1=0) (2=25) (3=50) (4=75) (5=100)

*3. Körperliche Summenskala (PCS) und Psychische Summenskala (MCS) durch Summation der gewichteten Einzelitems bilden und eine Konstante zur Summe addieren*

| Körperliche Summenskala (PCS) = Summe                                                                                                                                                                                                                                                                                                                                                                                                                                         | Psychische Summenskala (MCS) = Summe                                                                                                                                                                                                                                                                                                                                                                                                                                         |
|-------------------------------------------------------------------------------------------------------------------------------------------------------------------------------------------------------------------------------------------------------------------------------------------------------------------------------------------------------------------------------------------------------------------------------------------------------------------------------|------------------------------------------------------------------------------------------------------------------------------------------------------------------------------------------------------------------------------------------------------------------------------------------------------------------------------------------------------------------------------------------------------------------------------------------------------------------------------|
| $[(I_{01\_gesund\_allg} * 0,07825238),$ $(I_{02\_mittelschwer} * 0,06506401),$ $(I_{03\_treppen} * 0,07483613),$ $(I_{04\_koerperl} * 0,07169783),$ $(I_{05\_dinge} * 0,07415414),$ $(I_{06\_seelisch} * -0,05759826),$ $(I_{07\_sorgfaltig} * -0,03226894),$ $(I_{08\_behindert} * 0,13397491),$ $(I_{09\_ruhig} * -0,04241186),$ $(I_{10\_energie} * 0,02996896),$ $(I_{11\_traurig} * -0,0533624),$ $(I_{12\_beeinträchtigt} * 0,00460968)]$ plus die Konstante 21,0468597 | $[(I_{01\_gesund\_allg} * -0,00091593),$ $(I_{02\_mittelschwer} * -0,03549865),$ $(I_{03\_treppen} * -0,03157714),$ $(I_{04\_koerperl} * -0,0251735),$ $(I_{05\_dinge} * -0,02465223),$ $(I_{06\_seelisch} * 0,1266861),$ $(I_{07\_sorgfaltig} * 0,08087236),$ $(I_{08\_behindert} * -0,02437137),$ $(I_{09\_ruhig} * 0,1094085),$ $(I_{10\_energie} * 0,06942713),$ $(I_{11\_traurig} * 0,1493789),$ $(I_{12\_beeinträchtigt} * 0,10857344)]$ plus die Konstante 12,6620483 |
